# Supplementary material for: The combination of metagenome and metabolome to compare the differential effects and mechanisms of fructose and sucrose on the metabolic disorders and gut microbiota in vitro and in vivo
Source: Royal Society of Chemistry journal article supplement (doi:10.1039/d3fo02246c), 2023-01-01
Supplement: d3fo02246c1.pdf [file d3fo02246c1.pdf]

Table S1 The nutrient component of the diet

| Ingredients              | %       | Nutrient levels | kcal% |
|--------------------------|---------|-----------------|-------|
| Casein                   | 20.0    | Protein         | 20.3  |
| L-Cystine                | 0.3     | Carbohydrate    | 63.9  |
| Corn starch              | 39.7486 | Fat             | 15.8  |
| Maltodextrin             | 13.2    |                 |       |
| Sucrose                  | 10.0    |                 |       |
| Cellulose                | 5.0     |                 |       |
| Soybean oil              | 7.0     |                 |       |
| Mineral mix <sup>1</sup> | 3.5     |                 |       |
| Vitamin mix <sup>1</sup> | 1.0     |                 |       |
| Choline                  | 0.25    |                 |       |
| t-Butylhydroquinone      | 0.014   |                 |       |

<sup>1</sup>Referring to the standard AIN93G diet.

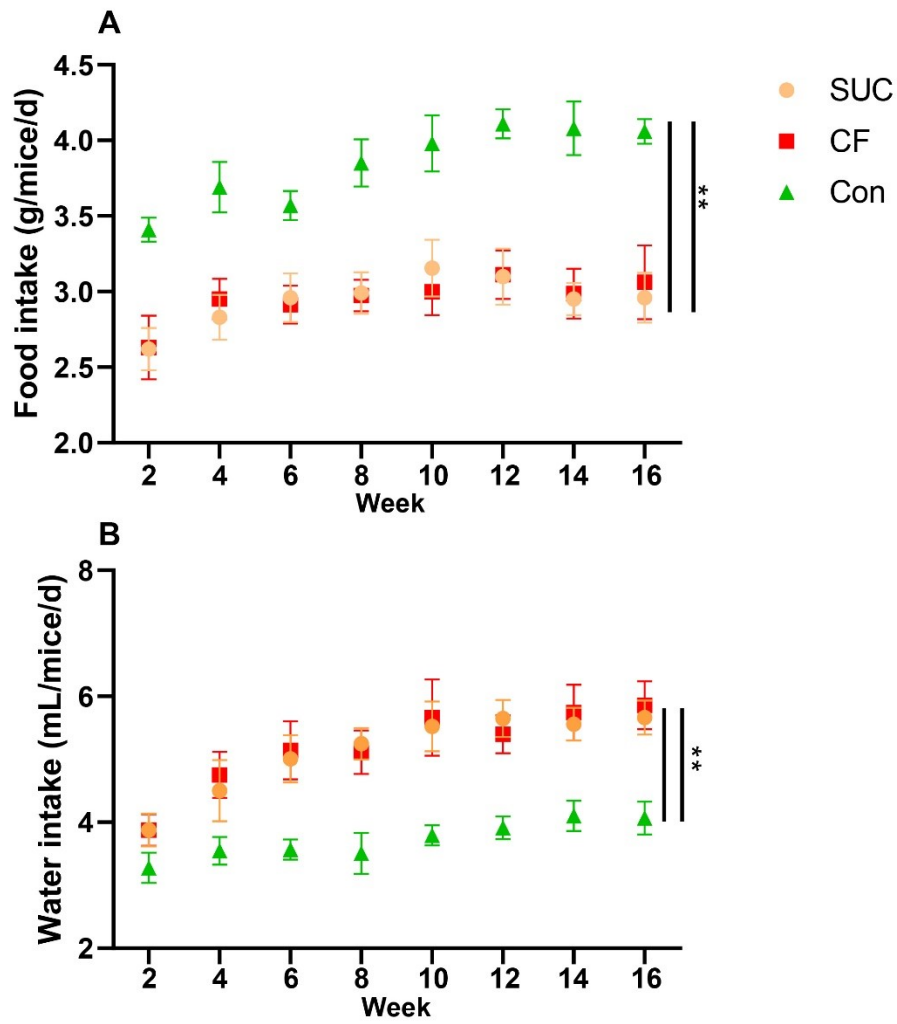

Fig S1. The changes of food intake and water intake in all groups. (A) Food intake. (B) Water intake.
